# Supplementary material for: A Saliva Protein of Varroa Mites Contributes to the Toxicity toward Apis cerana and the DWV Elevation in A. mellifera
Source: PubMed Central journal article supplement (PMC5821841; doi:10.1038/s41598-018-21736-9), 2018-02-21
Supplement: 41598_2018_21736_MOESM1_ESM.pdf [file 41598_2018_21736_MOESM1_ESM.pdf]

Supplementary information-SREP-17-35449B

**A Saliva Protein of *Varroa* Mites Contributes to the Toxicity toward *Apis cerana***

**and the DWV Elevation in *A. mellifera***

Yi Zhang, Richou Han\*

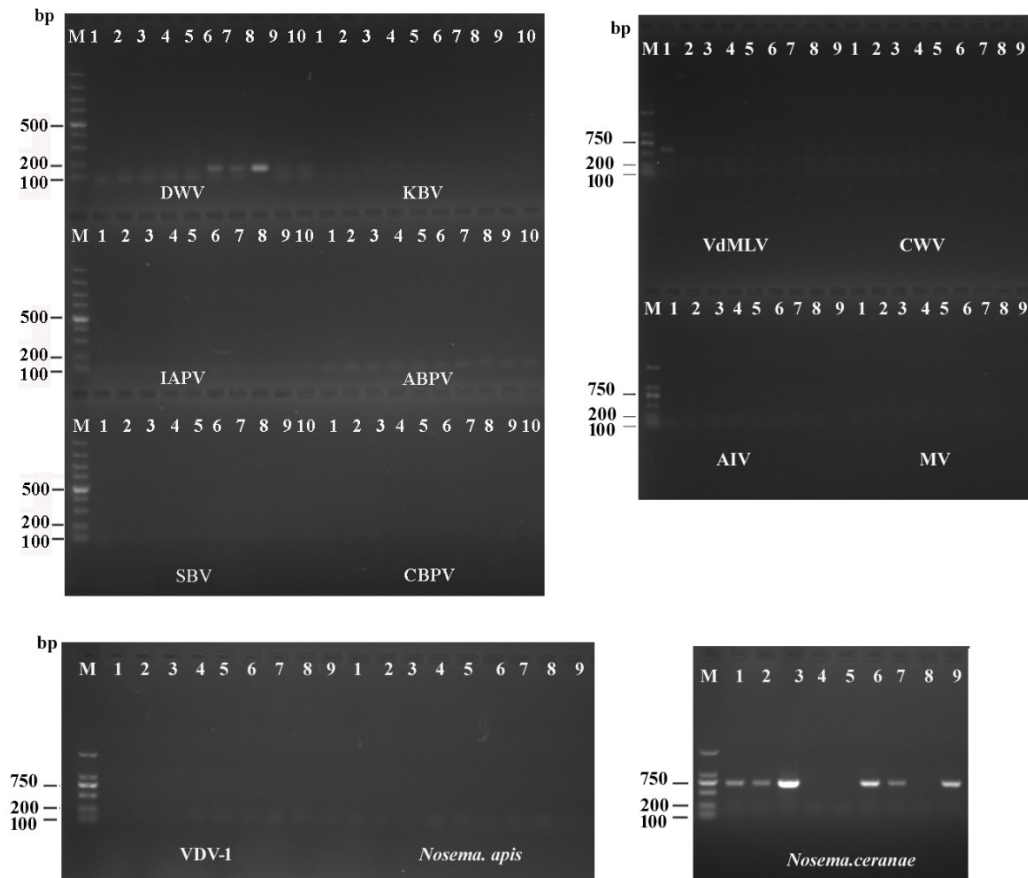

**Supplementary Figure S1. Detection of viruses and *Nosema* from worker L5 larvae of *A. mellifera* after VTP injection.** 1, 9: L5 worker larvae without injection; 2: L5 worker larvae injected with PBS (10 mM, pH 7.4); 3, 8: L5 worker larvae injected with tag protein purified from *E. coli* Transetta pET32(a); 4, 5, 6, 7, 8: the adults developed from worker L5 larvae injected with the purified E-VTP at different concentrations (0.01 ng/ $\mu$ L, 0.1 ng/ $\mu$ L, 1.0 ng/ $\mu$ L, 2.0 ng/ $\mu$ L, and 5.0 ng/ $\mu$ L).

predicted signal peptide

|     |  |                                         |          |          |          |          |          |                        |
|-----|--|-----------------------------------------|----------|----------|----------|----------|----------|------------------------|
|     |  | 10                                      | 20       | 30       | 40       | 50       | 60       |                        |
| 1   |  | ATGTTCAA                                | ACTTCTCG | TATCGCG  | ACCCTCGT | GGCTGTAG | CCATCGCT | GATGTGCAGCCA           |
| 1   |  | M F K L L V I A T V V A V A I A         |          |          |          |          |          | D V Q P                |
|     |  | 70                                      | 80       | 90       | 100      | 110      | 120      |                        |
| 61  |  | GCCATTGAGG                              | CTTTAAAG | ACCGCTAT | CGACAATC | TCGATATT | CCCGATGA | ACGCAAGGCT             |
| 21  |  | A I E A L K T A I D N L D I P D E R K A |          |          |          |          |          |                        |
|     |  | 130                                     | 140      | 150      | 160      | 170      | 180      |                        |
| 121 |  | CTTTATAAGG                              | CCAGCGCT | GACAAATC | GAAAGGAT | GCCTTGA  | AAGGTGTT | GCCCGCTGATGCC          |
| 41  |  | L Y K A S A D K S K E C L E G V A A D A |          |          |          |          |          |                        |
|     |  | 190                                     | 200      | 210      | 220      | 230      | 240      |                        |
| 181 |  | GGACCAGA                                | ACGCATT  | CAAGACT  | TACATCAC | CAAGCTG  | AGCCCCTC | GCCTCGCTGCTTGCAGC      |
| 61  |  | G P E R I Q D Y I T K L S P L V A A C S |          |          |          |          |          |                        |
|     |  | 250                                     | 260      | 270      | 280      | 290      | 300      |                        |
| 241 |  | GAAGAAAT                                | CAAAGG   | TATTGCC  | CATGATC  | ATGTTG   | AGGAGCG  | CAAAACAAAGTTCCAGGAA    |
| 81  |  | E E I K G I A H D H V E E R K T K F Q E |          |          |          |          |          |                        |
|     |  | 310                                     | 320      | 330      | 340      | 350      | 360      |                        |
| 301 |  | TGCATGA                                 | AGGAAA   | AGGTT    | CACGGG   | GAAGAG   | TGACCC   | TGACGAAAAGCAGAAGGAGAAC |
| 101 |  | C M K E K V H G E E S T L D E K Q K E N |          |          |          |          |          |                        |
|     |  | 370                                     | 380      | 390      | 400      |          |          |                        |
| 361 |  | GTTGTCAA                                | AGTCA    | AGGCTT   | GCCTCC   | CAGCAG   | GCGCTC   | GCCTCCTAA              |
| 121 |  | V V K V K A C L Q Q A L A S *           |          |          |          |          |          |                        |

**Supplementary Figure S2. The cDNA and amino acid sequences of the *Varroa* toxic protein (VTP).**

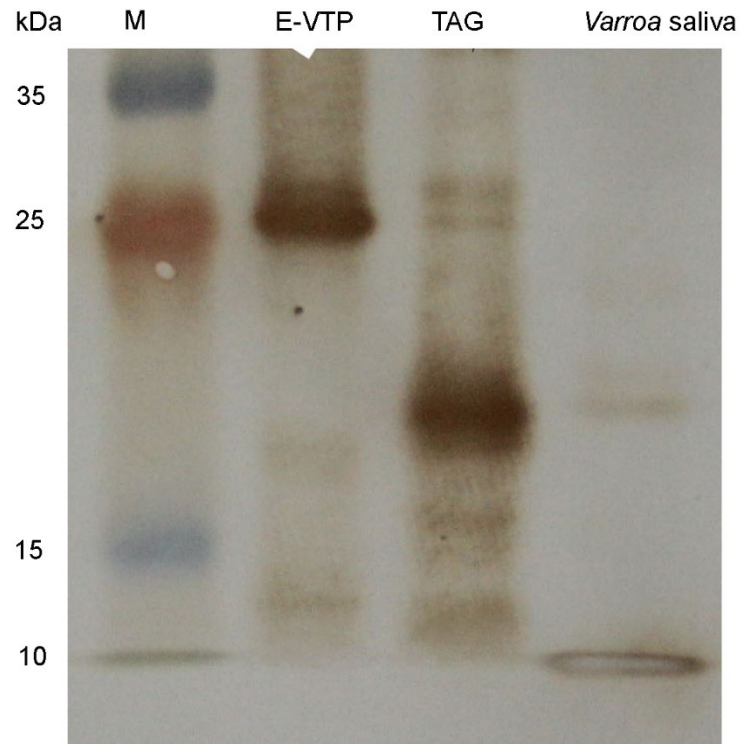

**Supplementary Figure S3. Western blot analysis of VTP in crude *Varroa saliva*.** M, Pre-stained protein marker; *Varroa saliva*: crude saliva of *V. destructor*; E-VTP, purified recombinant fusion VTP; TAG, purified tag protein.

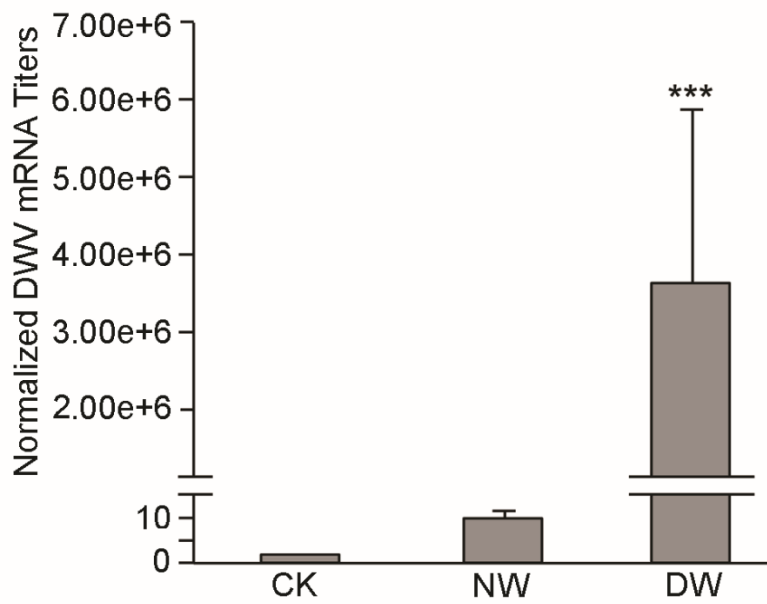

**Supplementary Figure S4. Quantitative titers of DWV in *A. mellifera* adults.** CK: Adults with normal wings and without injection at L5 larvae; NW: Adults with normal wings and PBS injection at L5 larvae; DW: Adults with deformed wings after injected with E-VTP at L5 larvae.

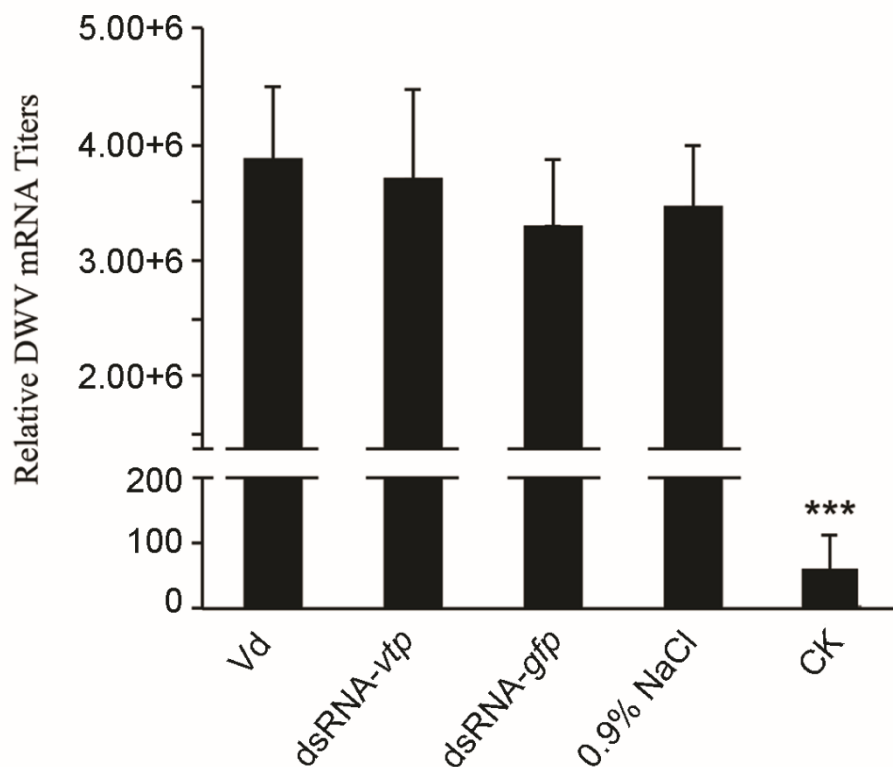

**Supplementary Figure S5. Relative DWV mRNA levels in newly emerged worker bees (*A. mellifera*) infected by RNAi-treated *Varroa* mites.** *A. mellifera* were infected with mites treated by overnight (approximately 15 hours) immersion in different solutions at 16°C. CK, No mites; Vd, *V. destructor* mites that were not treated; 0.9% NaCl, mites treated with 0.9% NaCl; dsRNA-*gfp*, mites treated with dsRNA-*gfp* (2.5 µg/µL); dsRNA-*vtp*, mites treated with dsRNA-*vtp* (2.5 µg/µL).

**Supplementary Table S1. Quantitative titers of DWV in *A. cerana* adults developed from worker L5 larvae.**

| Treatment                | Ct (Average $\pm$ SD) | ANOVA (df=8,35; F=0.441; P=0.885) |
|--------------------------|-----------------------|-----------------------------------|
| CK                       | 34.1 $\pm$ 0.5        | a                                 |
| PBS                      | 33.3 $\pm$ 1.1        | a                                 |
| TAG (2.0 ng/ $\mu$ L)    | 33.9 $\pm$ 0.5        | a                                 |
| E-VTP (0.01 ng/ $\mu$ L) | 33.6 $\pm$ 0.8        | a                                 |
| E-VTP (0.1 ng/ $\mu$ L)  | 33.4 $\pm$ 1.6        | a                                 |
| E-VTP (1.0 ng/ $\mu$ L)  | 33.4 $\pm$ 1.8        | a                                 |
| E-VTP (2.0 ng/ $\mu$ L)  | 34.1 $\pm$ 0.8        | a                                 |
| E-VTP (5.0 ng/ $\mu$ L)  | 33.8 $\pm$ 0.5        | a                                 |
| NTC                      | 33.2 $\pm$ 1.0        | a                                 |

All the bee samples were collected and the DWV genome equivalents were measured by using qRT-PCR<sup>34, 35</sup>. CK, the adults developed from worker L5 larvae without any injection; PBS, the adults developed from worker L5 larvae injected with PBS (10 mM, pH 7.4); TAG, the adults developed from worker L5 larvae injected with purified tag protein from *E. coli* Transetta pET32(a). E-VTP (0.01 ng/ $\mu$ L, 0.1 ng/ $\mu$ L, 1.0 ng/ $\mu$ L, 2.0 ng/ $\mu$ L, and 5.0 ng/ $\mu$ L), the adults developed from worker L5 larvae injected with the purified E-VTP at different concentrations (0.01 ng/ $\mu$ L, 0.1 ng/ $\mu$ L, 1.0 ng/ $\mu$ L, 2.0 ng/ $\mu$ L, and 5.0 ng/ $\mu$ L). NTC: no template control during the qRT-PCR. Three replicates were established for each treatment. The data were analyzed using a normal one-way analysis of variance (ANOVA) using SPSS statistical software (16.0), and the significance of the between treatment differences was evaluated using Duncan's multiple range test, with significance indicated by a *P* value of  $< 0.05$ . The data presented are the mean values  $\pm$  S.D. The same letters indicated no significant difference.

**Supplementary Table S2. Primers used for the detection of viruses and microsporidia parasites.**

| Organism                                           | Primer sequences                                                                  | References |
|----------------------------------------------------|-----------------------------------------------------------------------------------|------------|
| Deformed Wing Virus (DWV)                          | DWV-F: GACAAAATGACGAGGAGATTGTT<br>DWV-R: CAACTACCTGTAATGTCGTCGTGTT                | 5          |
| Acute Paralysis Bee Virus (APBV)                   | APBV-F: TTATGTGTCCAGAGACTGTATCCA<br>APBV-R: GCTCCTATTGCTCGGTTTTTCGGT              | 31         |
| Chronic Bee Paralysis Virus (CBPV)                 | CBPV-F: AGTTGTCATGGTTAACAGGATACGAG<br>CBPV-R: TCTAATCTTAGCACGAAAGCCGAG            | 31         |
| Black Queen Cell Virus (BQCV)                      | BQCV-F: TGGTCAGCTCCCCTACCTTAAAC<br>BQCV-R: GCAACAAGAAGAAACGTAAACCAC               | 31         |
| Kashmir Bee Virus (KBV)                            | KBV-F: GATGAACGTCGACCTATTGA<br>KBV-R: TGTGGGTTGGCTATGAGTCA                        | 31         |
| Sacbrood Virus (SBV)                               | SBV-F: GCTGAGGTAGGATCTTTGCGT<br>SBV-R: TCATCATCTTCACCATCCGA                       | 31         |
| <i>Apis mellifera</i> Filamentous Virus (AmFV)     | AmFV -F: CAGAGAATTCGGTTTTTGTGAGTG<br>AmFV -R: CATGGTGGCCAAGTCTTGCT                | 40         |
| Big Sioux River Virus (BSRV)                       | BSRV-F: RGTGCAGCTTTATGCGTTGCC<br>BSRV-R: CCGCTGTTGAGAATAAGGATATCCAGG              | 41         |
| Lake Sinai Virus complex (LSV)                     | LSVdeg-F: GCCWCGRYTGTGGTYCCCCC<br>LSVdeg-R: GAGGTGGCGGCGCSAGATAAAGT               | 42         |
| Slow Bee Paralysis Virus (SBPV)                    | SBPV-F: GATTTGCGGAATCGTAATATTGTTTG<br>SBPV-R: ACCAGTTAGTACACTCCTGGTAACTTCG        | 43         |
| <i>Varroa destructor</i> Macula-like virus (VdMLV) | VdMLV-F : ATCCCTTTTCAGTTCGCT<br>VdMLV-R : AGAAGAGACTTCAAGGAC                      | 44         |
| Israeli Acute Paralysis Virus (IAPV)               | IAPV-F: AGACACCAATCACGGACCTCAC<br>IAPV-R: AGATTTGTCTGTCTCCAGTGACAT                | 45         |
| Cloudy Wing Virus (CWV)                            | CWV-F: ATCAGCGCTTAGTGGAGGAA<br>CWV-R: TCGACAATTTTCGGACATCA                        | 46         |
| <i>Apis Iridescent</i> Virus (AIV)                 | AIV-F: GGCTAGTAAACGTAGTGGATATGACAAT<br>AIV-R: CACCTGGTGGTCCAAGAGAAG               | 47         |
| <i>Varroa destructor</i> Virus 1 (VDV-1)           | VDV1-R: CTTCCAAGGGCTCATCCATA<br>VDV1-F: CATGGAAATGGGATCAAACC                      | 48         |
| Moku Virus (MV)                                    | MV-F: GTGCGATAGCTAAGCCTGAGATGG<br>MV-R: CAGTGCCCCCTATAGGTGTTGTT                   | 49         |
| <i>Nosema.apis</i>                                 | <i>N.apis</i> -F: CCATTGCCGGATAAGAGAGT<br><i>N.apis</i> -R: CCACCAAAAACCTCCCAAGAG | 32         |



|                       |                                                                                                   |    |
|-----------------------|---------------------------------------------------------------------------------------------------|----|
| <i>Nosema.ceranae</i> | <i>N.ceranae</i> -F: GACAACAAGGAAGACCTGGAAGTG<br><i>N.ceranae</i> -R: TGTGAATAAGAGGGTGATCCTGTTGAG | 32 |
|-----------------------|---------------------------------------------------------------------------------------------------|----|
